# Supplementary material for: Modelling the cost‐effectiveness of pulse oximetry in primary care management of acute respiratory infection in rural northern Thailand
Source: PubMed Central journal article supplement (PMC9805201; doi:10.1111/tmi.13812), 2022-08-30
Supplement: TMI-27-881-s001.pdf [file TMI-27-881-s001.pdf]

**MAIN ANALYSIS**

|               | Median age | No.          | % H0 deaths in 2 years | H1 deaths in 2 years | Difference in deaths in 2 years | YLL for death at median age | Life years gained in 2 years | Life years gained in 1 year | Cost difference excl. direct costs in 2 years | Cost difference excl. direct costs in 1 year | Cost difference incl. direct costs in 1 year | Cost per life year gained incl. direct costs | Cost per life year gained excl. direct costs | Antibiotic cost savings in 1 year |
|---------------|------------|--------------|------------------------|----------------------|---------------------------------|-----------------------------|------------------------------|-----------------------------|-----------------------------------------------|----------------------------------------------|----------------------------------------------|----------------------------------------------|----------------------------------------------|-----------------------------------|
| Children <5   | 2          | 14075        | 28.174                 | 2.084451             | 2.031538                        | 0.052913                    | 77.155993                    | 4.082554                    | 2.041277                                      | -73999.46021                                 | -36999.7301                                  | -12756.9621                                  | -6249.500059                                 | 11650.539                         |
| Children 5-14 | 8          | 11741        | 23.502                 | 0.820555             | 0.799726                        | 0.0208295                   | 71.593286                    | 1.49125                     | 0.745625                                      | -49698.3905                                  | -24849.19525                                 |                                              | -33326.65603                                 | 14915.35                          |
| Adults        | 45         | 24142        | 48.325                 | 1.747495             | 1.703135                        | 0.0443595                   | 39.037158                    | 1.731668                    | 0.865834                                      | -105888.505                                  | -52944.25251                                 |                                              | -61148.27491                                 | 31801.351                         |
| <b>Total</b>  | <b>13</b>  | <b>49958</b> | <b>100</b>             | <b>4.652501</b>      | <b>4.534399</b>                 | <b>0.1181019</b>            | <b>57.427888</b>             | <b>7.305473</b>             | <b>3.652736</b>                               | <b>-229586.3557</b>                          | <b>-114793.1779</b>                          | <b>-90550.40986</b>                          |                                              | <b>58367.24</b>                   |

H0 - standard of care

H1 - standard of care + pulse oximetry

Assume lifespan of one oximeter is 2 years

|                                                |                  |
|------------------------------------------------|------------------|
| Purchase price of one oximeter set plus neonat | 275              |
| Maintenance cost of one oximeter set per year  | 55               |
| District-wide training cost over 2 years       | 2649.504         |
| Extra staff cost per PCU over two years        | 662.376          |
| <b>Total oximeter costs over 2 years</b>       | <b>48485.536</b> |
| <b>Total oximeter costs over 1 year</b>        | <b>24242.768</b> |

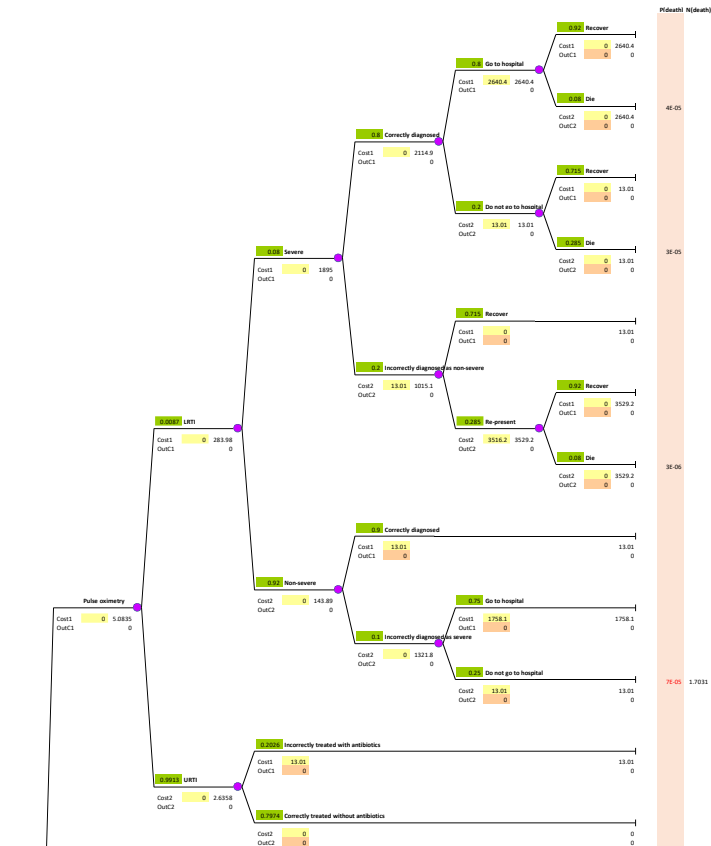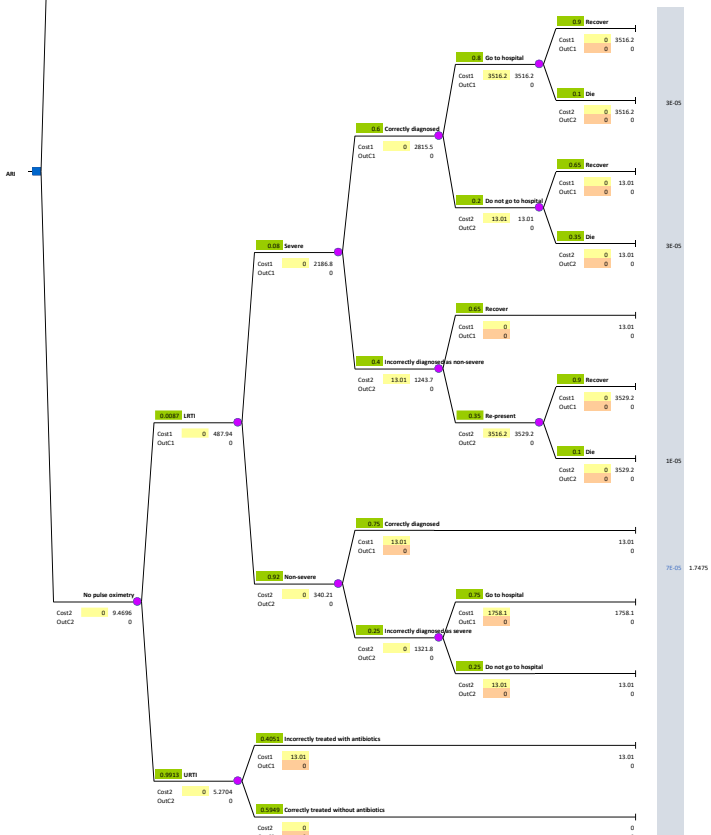

Per patient: Cost savings 4,386.1  
 Antibiotic cost savings 2,634.5

In 2 years: LRTI 209  
 URTI 23933  
 Total 24142

URTIs and prescribed antibiotics 9696  
 Life years gained in 2 years 1.7317

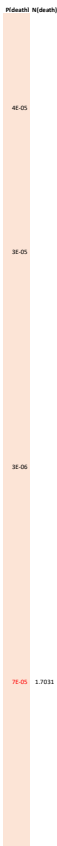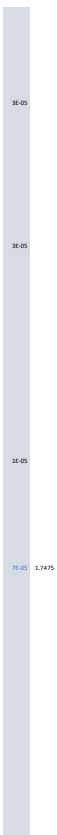

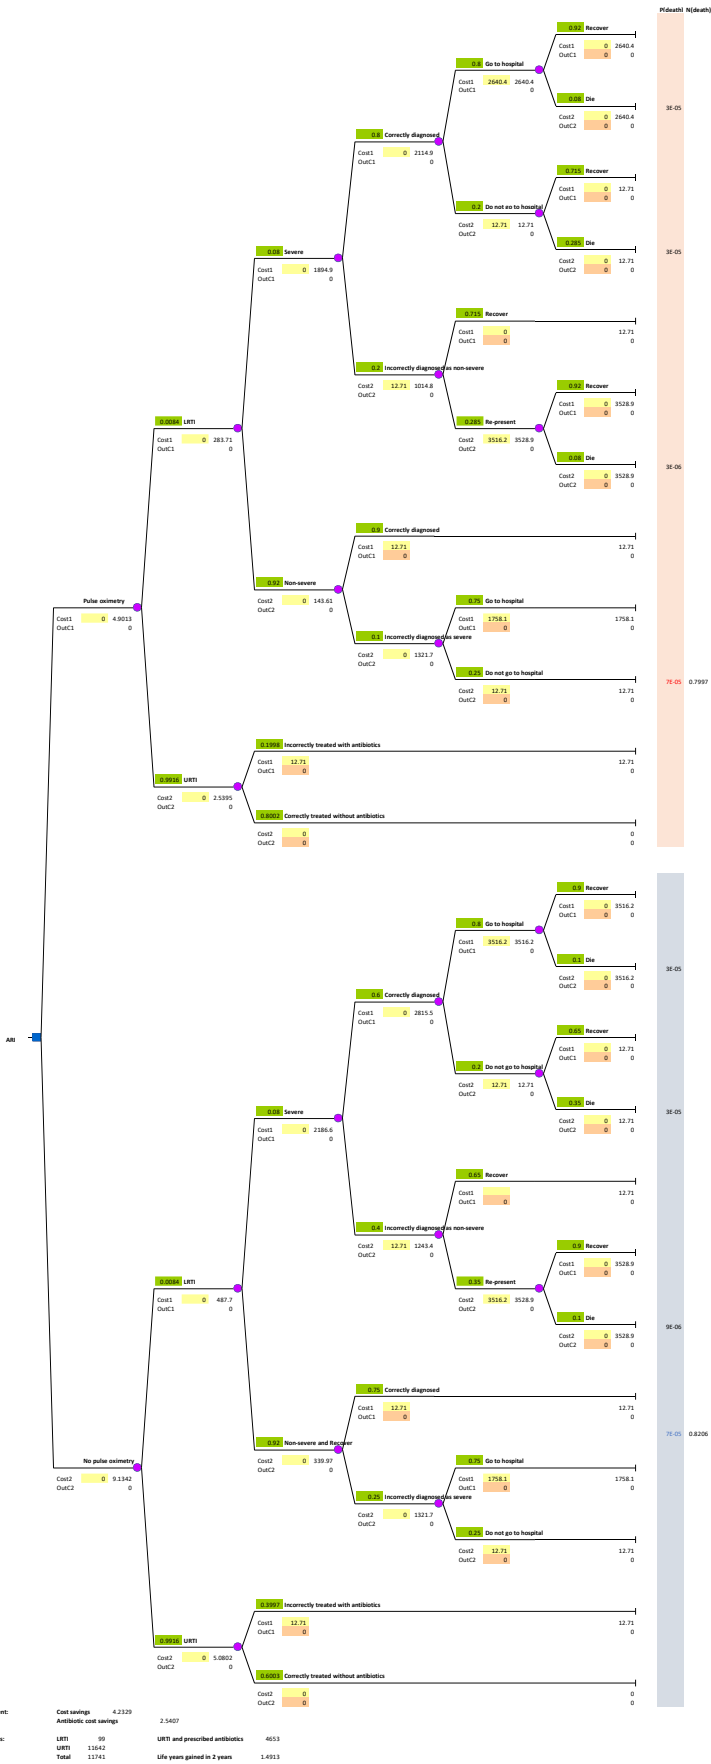

|              |                         |        |                                 |        |
|--------------|-------------------------|--------|---------------------------------|--------|
| Per patient: | Cost savings            | 4,2329 | 2,5407                          |        |
|              | Antibiotic cost savings |        |                                 |        |
| In 2 years:  | LRTI                    | 99     | WRTI and prescribed antibiotics | 4653   |
|              | WRTI                    | 13642  |                                 |        |
|              | Total                   | 13741  | Life years gained in 2 years    | 1,4913 |

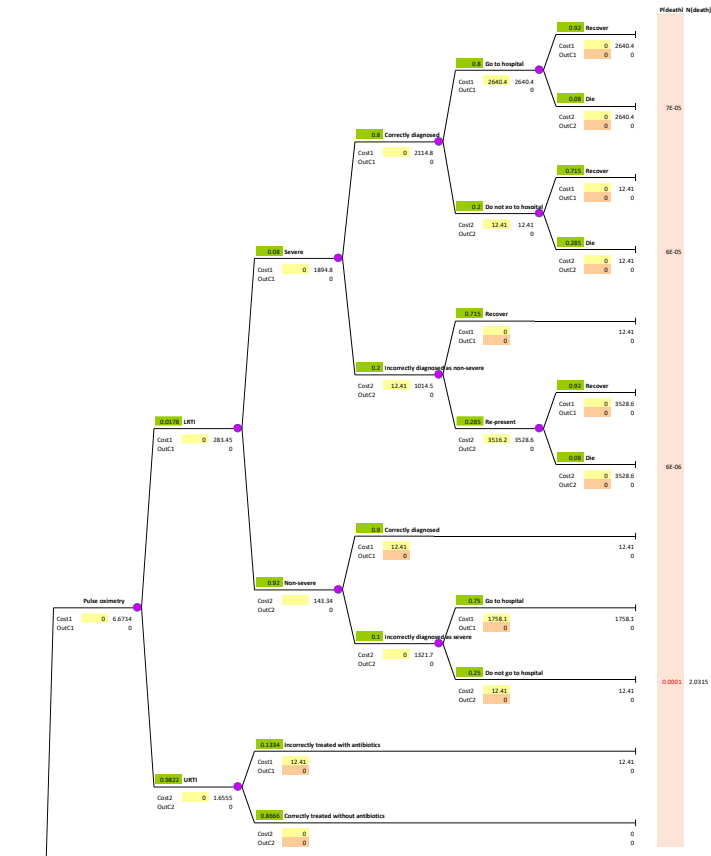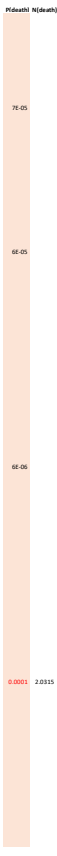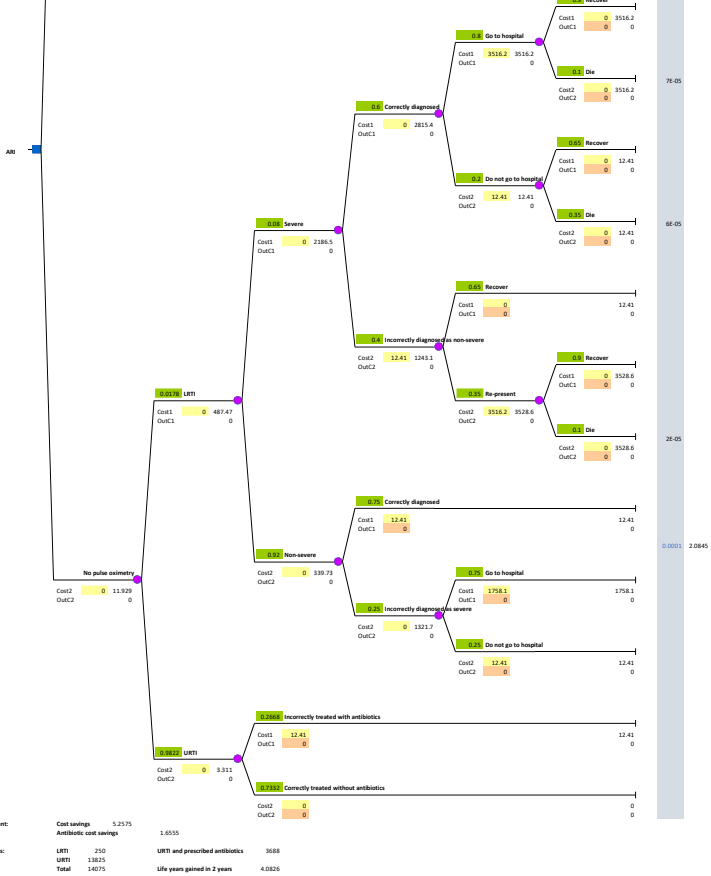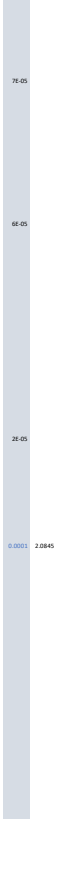

Per patient: Cost savings 5,2375  
 Antibiotic cost savings 1,6555

In 2 years:  
 LRTI 250  
 URTI 13825  
 Total 14075

URT and prescribed antibiotics 3688  
 Life years gained in 2 years 4.0826
