# Supplementary material for: Modelling the cost‐effectiveness of pulse oximetry in primary care management of acute respiratory infection in rural northern Thailand
Source: PubMed Central journal article supplement (PMC9805201; doi:10.1111/tmi.13812), 2022-08-30
Supplement: TMI-27-881-s003.pdf [file TMI-27-881-s003.pdf]

**SENSITIVITY ANALYSIS 1**

Parameters as per main analysis except for pulse oximetry sensitivity of 70% and specificity of 85% for diagnosing severe LRTI

|               | Median age | No.          | % H0 deaths in 2 years | H1 deaths in 2 years | Difference in deaths in 2 years | YLL for death at median age in 2 years | Life years gained in 2 years | Life years gained in 1 year | Cost difference excl. direct costs in 2 years | Cost difference excl. direct costs in 1 year | Cost difference incl. direct costs in 1 year | Cost per life year gained incl. direct costs | Cost per life year gained excl. direct costs | Antibiotic cost savings in 1 year |
|---------------|------------|--------------|------------------------|----------------------|---------------------------------|----------------------------------------|------------------------------|-----------------------------|-----------------------------------------------|----------------------------------------------|----------------------------------------------|----------------------------------------------|----------------------------------------------|-----------------------------------|
| Children <5   | 2          | 14075        | 28.174                 | 2.084451             | 2.072876                        | 0.011575                               | 77.155993                    | 0.893059                    | 0.446529                                      | -60428.92958                                 | -30214.46479                                 | -5971.696792                                 | -13373.58056                                 | -11650.539                        |
| Children 5-14 | 8          | 11741        | 23.502                 | 0.820555             | 0.815999                        | 0.004556                               | 71.593286                    | 0.326211                    | 0.163106                                      | -44357.11225                                 | -22178.55613                                 |                                              |                                              | -14915.35                         |
| Adults        | 45         | 24142        | 48.325                 | 1.747495             | 1.737791                        | 0.009704                               | 39.037158                    | 0.378802                    | 0.189401                                      | -94515.22531                                 | -47257.61266                                 |                                              |                                              | -31801.351                        |
| <b>Total</b>  | <b>13</b>  | <b>49958</b> | <b>100</b>             | <b>4.652501</b>      | <b>4.626666</b>                 | <b>0.025835</b>                        | <b>57.427888</b>             | <b>1.598072</b>             | <b>0.799036</b>                               | <b>-199301.2672</b>                          | <b>-99650.63358</b>                          | <b>-75407.86558</b>                          |                                              | <b>-58367.24</b>                  |

H0 - standard of care

H1 - standard of care + pulse oximetry

Assume lifespan of one oximeter is 2 years

|                                               |                  |
|-----------------------------------------------|------------------|
| Purchase price of one oximeter set plus neon  | 275              |
| Maintenance cost of one oximeter set per year | 55               |
| District-wide training cost over 2 years      | 2649.504         |
| Extra staff cost per PCU over two years       | 662.376          |
| <b>Total oximeter costs over 2 years</b>      | <b>48485.536</b> |
| <b>Total oximeter costs over 1 year</b>       | <b>24242.768</b> |

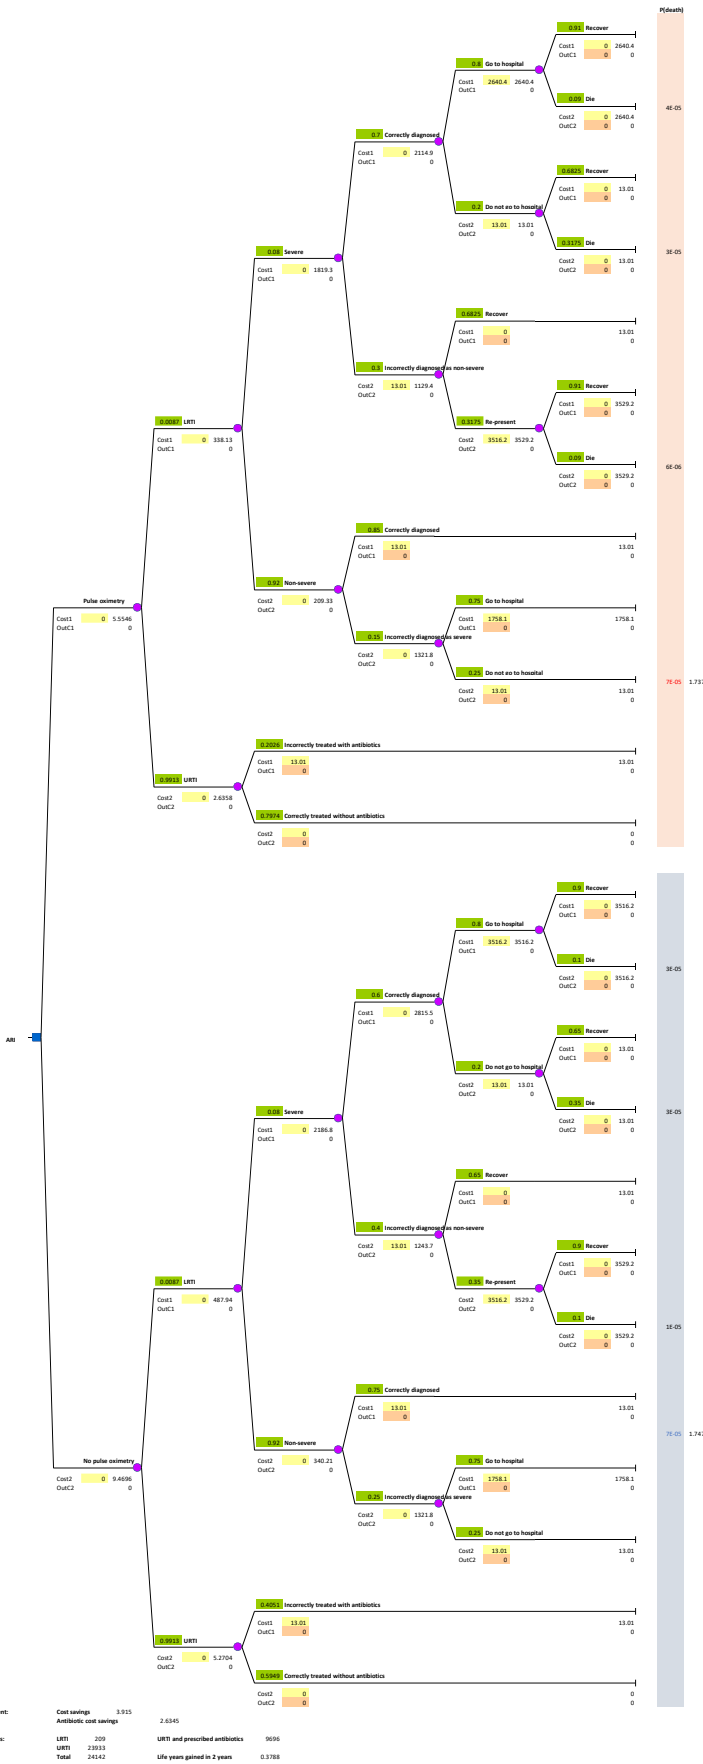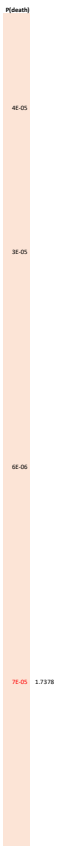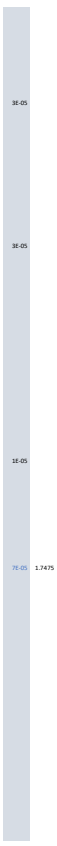

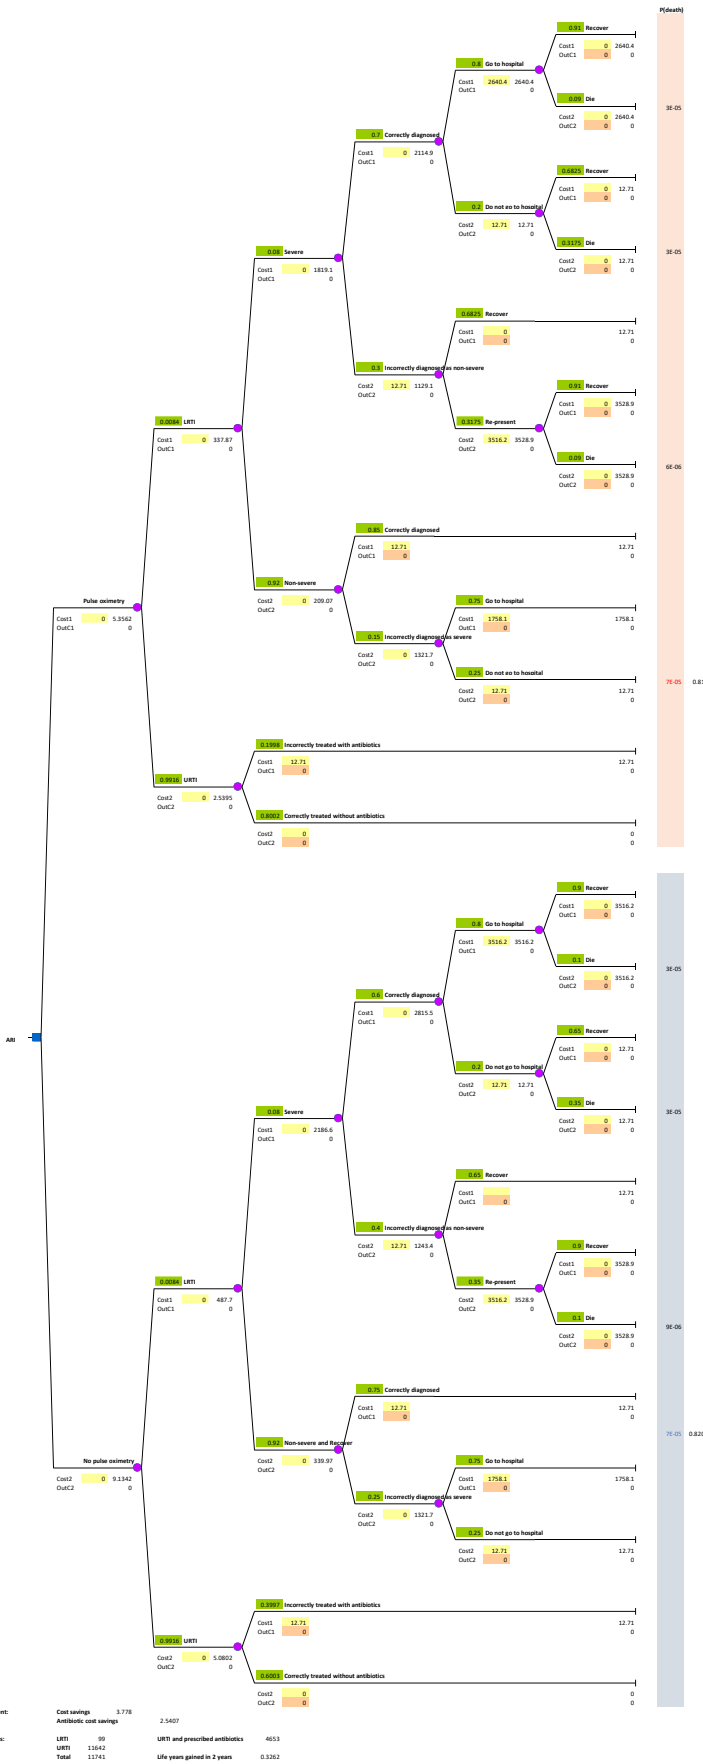

| Per patient: | Cost savings                    | 3.778  |
|--------------|---------------------------------|--------|
|              | Antibiotic cost savings         | 2.5407 |
| In 2 years:  | LRTI                            | 99     |
|              | URT                             | 13642  |
|              | Total                           | 13741  |
|              | LRTI and prescribed antibiotics | 4653   |
|              | Life years gained in 2 years    | 0.3262 |

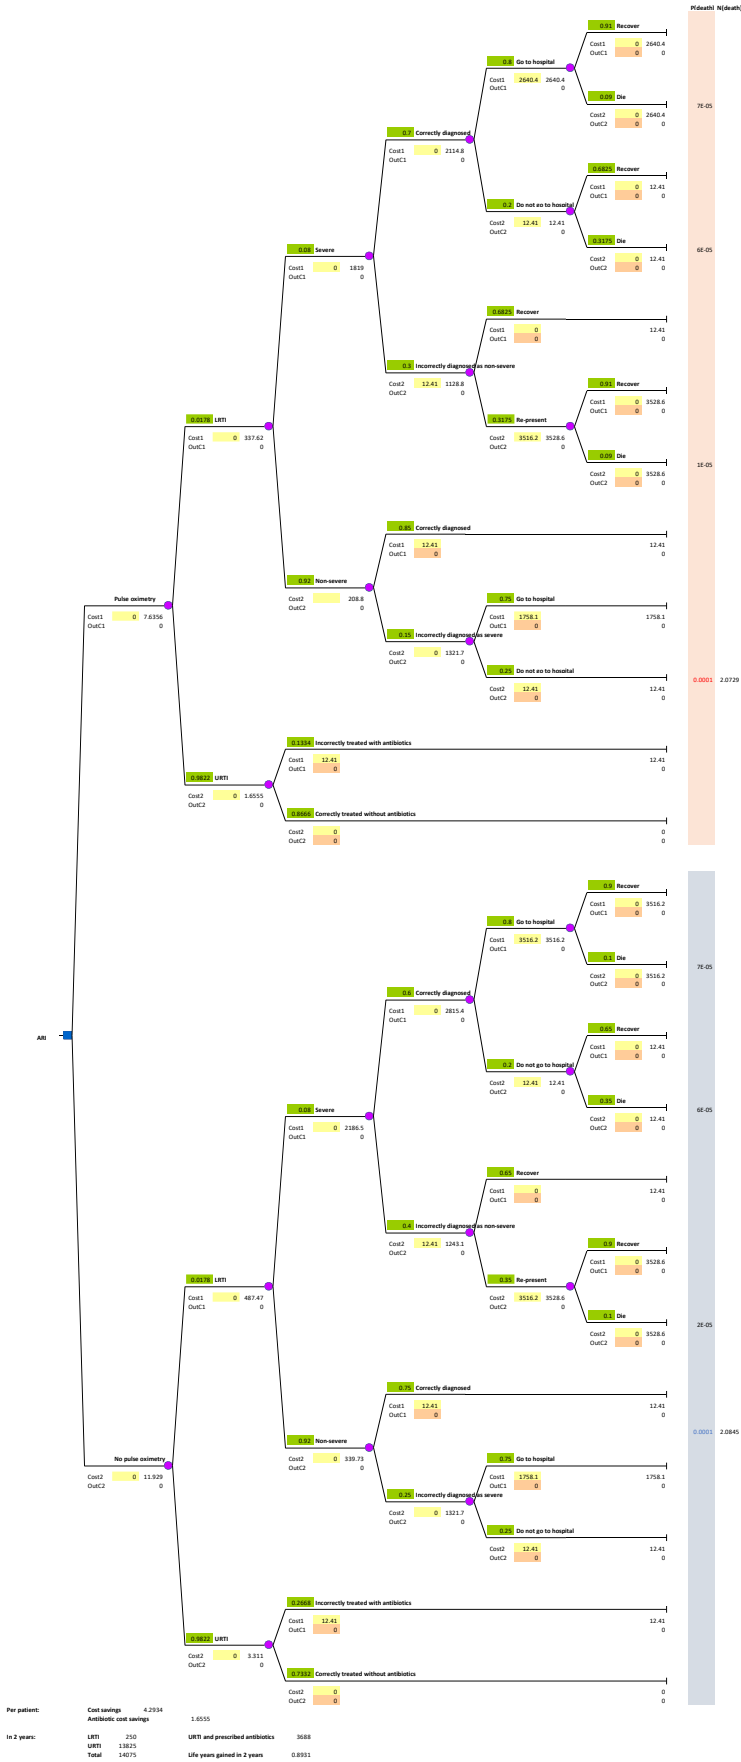

**SENSITIVITY ANALYSIS 2**

Parameters as per main analysis, but with no reduction in LOS of admitted patients, reduction in antibiotic prescriptions of 25%, and no antibiotic resistance cost

|               | Median age | No.          | % H0 deaths in 2 years | H1 deaths in 2 years | Difference in deaths in 2 years | YLL for death at median age in 2 years | Life years gained in 2 years | Life years gained in 1 year | Cost difference excl. direct costs in 2 years | Cost difference excl. direct costs in 1 year | Cost difference incl. direct costs in 1 year | Cost per life year gained incl. direct costs | Cost per life year gained excl. direct costs | Antibiotic cost savings in 1 year |
|---------------|------------|--------------|------------------------|----------------------|---------------------------------|----------------------------------------|------------------------------|-----------------------------|-----------------------------------------------|----------------------------------------------|----------------------------------------------|----------------------------------------------|----------------------------------------------|-----------------------------------|
| Children <5   | 2          | 14075        | 28.174                 | 2.084451             | 2.031538                        | 0.052913                               | 77.155993                    | 4.082554                    | 2.041277                                      | -86297.96671                                 | -43148.98336                                 | -18906.21536                                 | -9261.953828                                 | -286.33476                        |
| Children 5-14 | 8          | 11741        | 23.502                 | 0.820555             | 0.799726                        | 0.020829                               | 71.593286                    | 1.49125                     | 0.745625                                      | -34805.933                                   | -17402.9665                                  |                                              |                                              | -533.68128                        |
| Adults        | 45         | 24142        | 48.325                 | 1.747495             | 1.703135                        | 0.044359                               | 39.037158                    | 1.731668                    | 0.865834                                      | -74798.11997                                 | -37399.05999                                 |                                              |                                              | -1479.5787                        |
| <b>Total</b>  | <b>13</b>  | <b>49958</b> | <b>100</b>             | <b>4.652501</b>      | <b>4.534399</b>                 | <b>0.118102</b>                        | <b>57.427888</b>             | <b>7.305473</b>             | <b>3.652736</b>                               | <b>-195902.0197</b>                          | <b>-97951.00984</b>                          | <b>-73708.24184</b>                          |                                              | <b>-2299.5947</b>                 |

H0 - standard of care

H1 - standard of care + pulse oximetry

Assume lifespan of one oximeter is 2 years

|                                               |                  |
|-----------------------------------------------|------------------|
| Purchase price of one oximeter set plus neona | 275              |
| Maintenance cost of one oximeter set per year | 55               |
| District-wide training cost over 2 years      | 2649.504         |
| Extra staff cost per PCU over two years       | 662.376          |
| <b>Total oximeter costs over 2 years</b>      | <b>48485.536</b> |
| <b>Total oximeter costs over 1 year</b>       | <b>24242.768</b> |

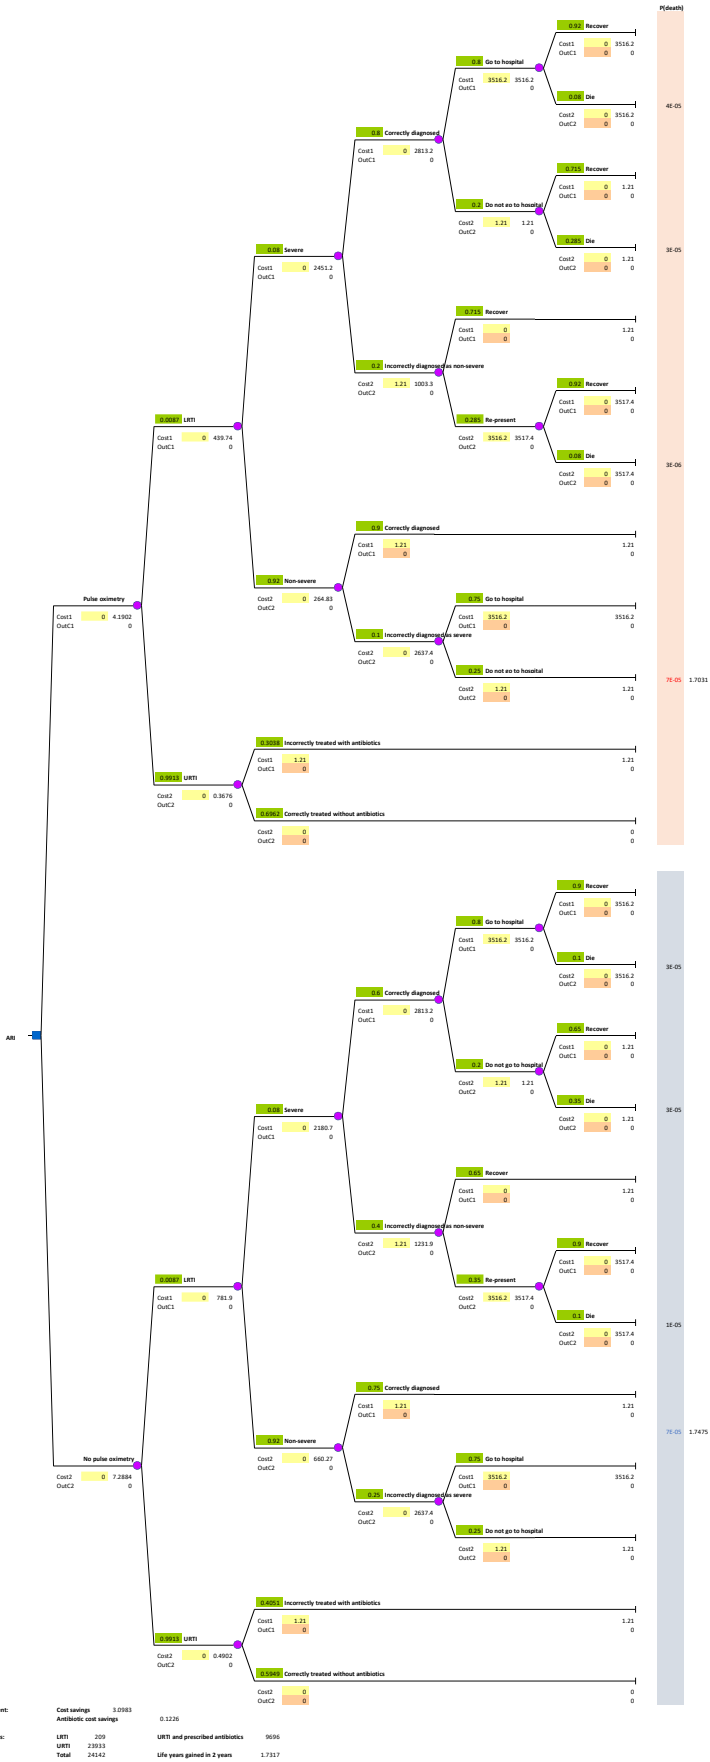

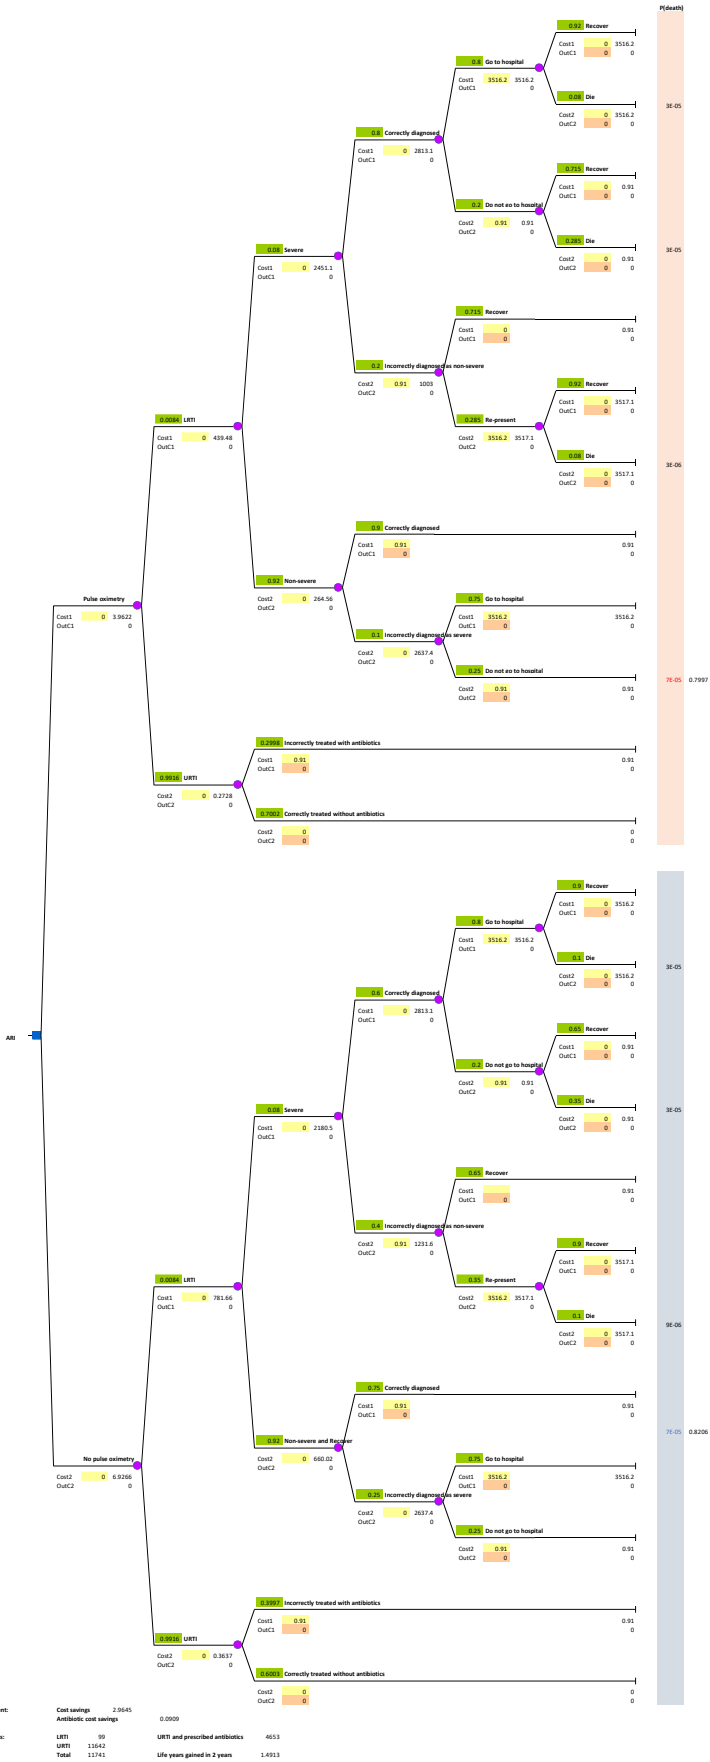

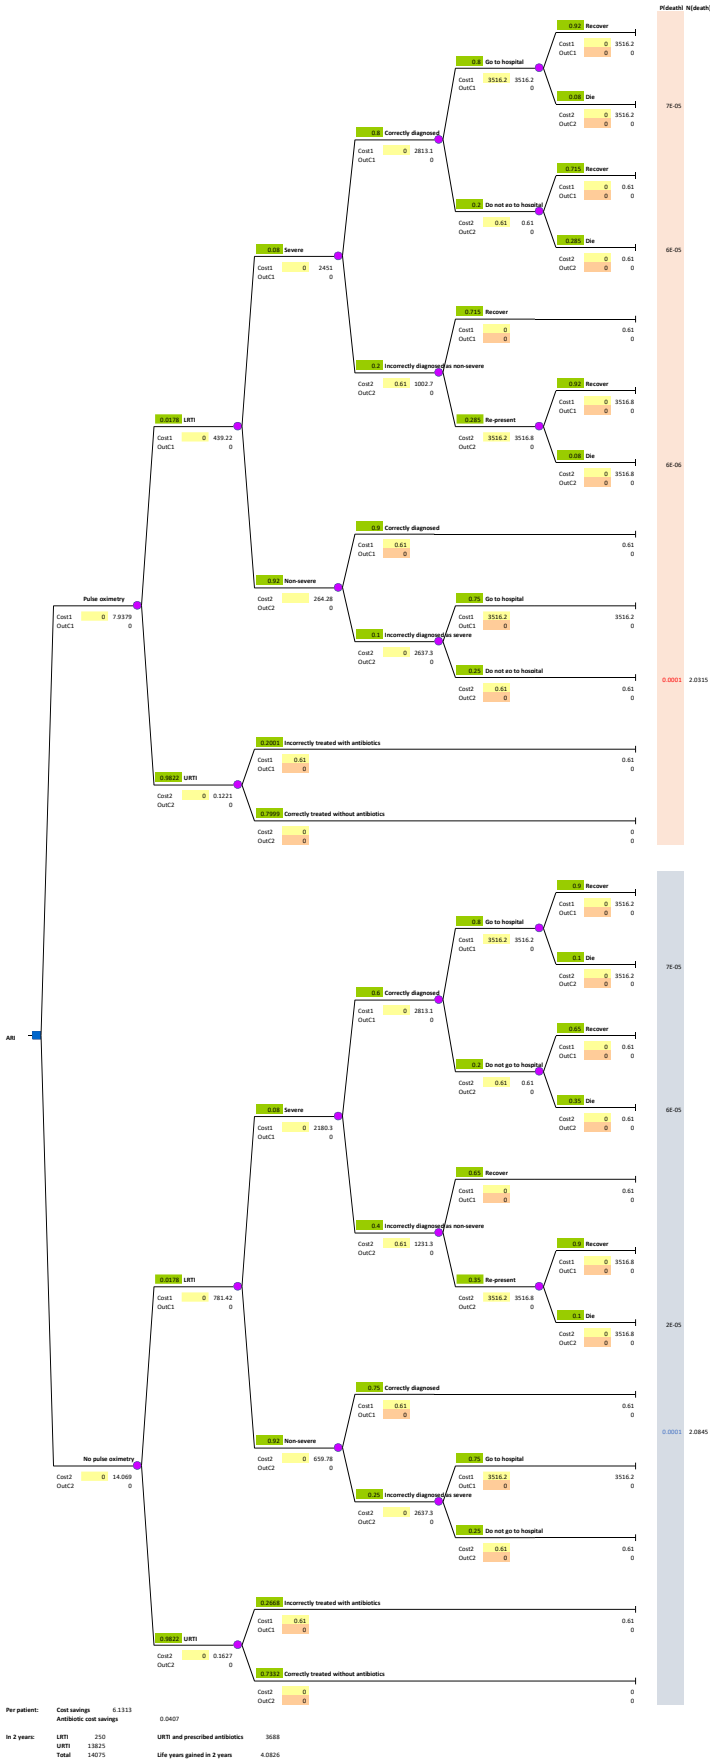



**SENSITIVITY ANALYSIS 3**

Parameters as per SA2, except for sensitivity and specificity of pulse oximetry for diagnosing severe LRTI as per SA1

|               | Median age | No.          | % H0 deaths in 2 years | H1 deaths in 2 years | Difference in deaths in 2 years | YLL for death at median age | Life years gained in 2 years | Life years gained in 1 year | Cost difference excl. direct costs in 2 years | Cost difference excl. direct costs in 1 year | Cost difference incl. direct costs in 1 year | Cost per life year gained incl. direct costs | Cost per life year gained excl. direct costs | Antibiotic cost savings in 1 year |
|---------------|------------|--------------|------------------------|----------------------|---------------------------------|-----------------------------|------------------------------|-----------------------------|-----------------------------------------------|----------------------------------------------|----------------------------------------------|----------------------------------------------|----------------------------------------------|-----------------------------------|
| Children <5   | 2          | 14075        | 28.174                 | 2.084451             | 2.072876                        | 0.011575                    | 77.155993                    | 0.893059                    | 0.446529                                      | -58852.6021                                  | -29426.30105                                 | -5183.533051                                 | -11608.4924                                  | 286.334763                        |
| Children 5-14 | 8          | 11741        | 23.502                 | 0.820555             | 0.815999                        | 0.004556                    | 71.593286                    | 0.326211                    | 0.163106                                      | -23847.39656                                 | -11923.69828                                 |                                              | -73104.19967                                 | 533.681285                        |
| Adults        | 45         | 24142        | 48.325                 | 1.747495             | 1.737791                        | 0.009704                    | 39.037158                    | 0.378802                    | 0.189401                                      | -51792.90737                                 | -25896.45368                                 |                                              | -136728.0505                                 | 1479.57868                        |
| <b>Total</b>  | <b>13</b>  | <b>49958</b> | <b>100</b>             | <b>4.652501</b>      | <b>4.626666</b>                 | <b>0.025835</b>             | <b>57.427888</b>             | <b>1.598072</b>             | <b>0.799036</b>                               | <b>-134492.906</b>                           | <b>-67246.45302</b>                          | <b>-43003.68502</b>                          |                                              | <b>2299.59473</b>                 |

H0 - standard of care

H1 - standard of care + pulse oximetry

Assume lifespan of one oximeter is 2 years

|                                                  |                  |
|--------------------------------------------------|------------------|
| Purchase price of one oximeter set plus neonatal | 275              |
| Maintenance cost of one oximeter set per year    | 55               |
| District-wide training cost over 2 years         | 2649.504         |
| Extra staff cost per PCU over two years          | 662.376          |
| <b>Total oximeter costs over 2 years</b>         | <b>48485.536</b> |
| <b>Total oximeter costs over 1 year</b>          | <b>24242.768</b> |

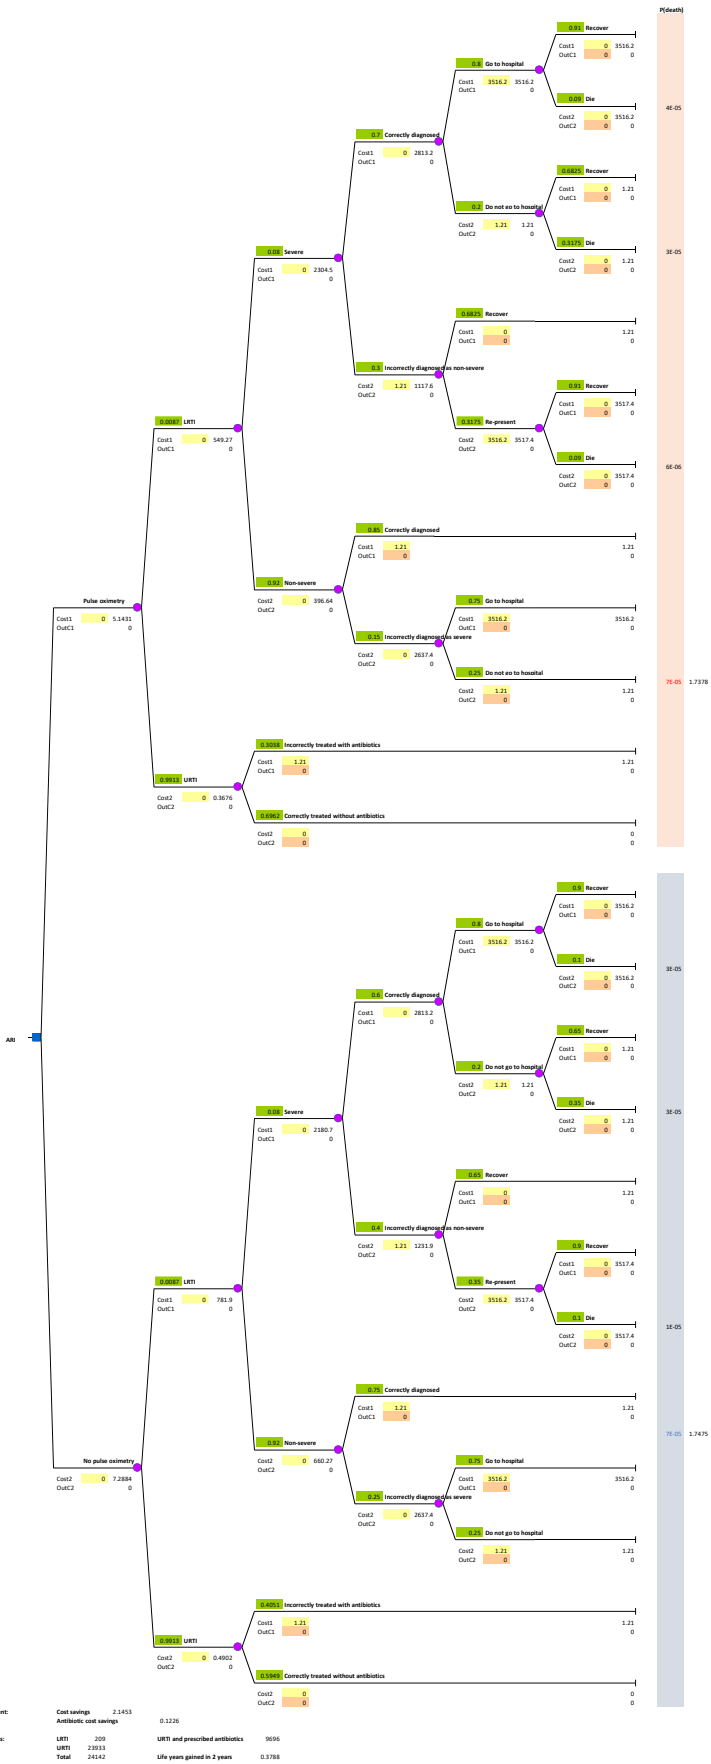

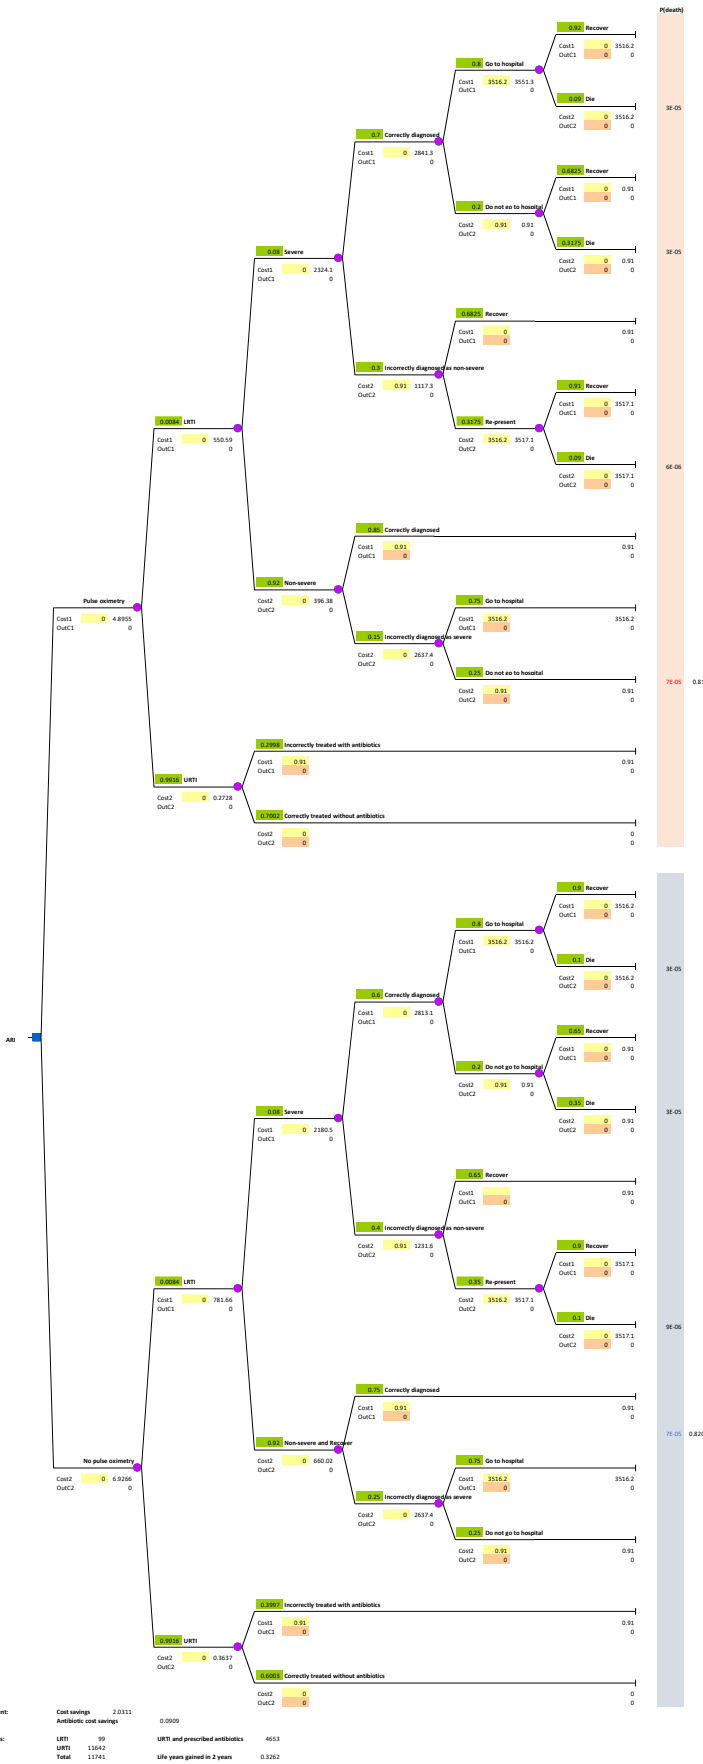

|              |                         |        |                                  |        |
|--------------|-------------------------|--------|----------------------------------|--------|
| Per patient: | Cost savings            | 2,0311 | 0.0909                           |        |
|              | Antibiotic cost savings |        |                                  |        |
| In 2 years:  | LRTI                    | 99     | URTIs and prescribed antibiotics | 4653   |
|              | URTIs                   | 13642  |                                  |        |
|              | Total                   | 13741  | Life years gained in 2 years     | 0.3262 |

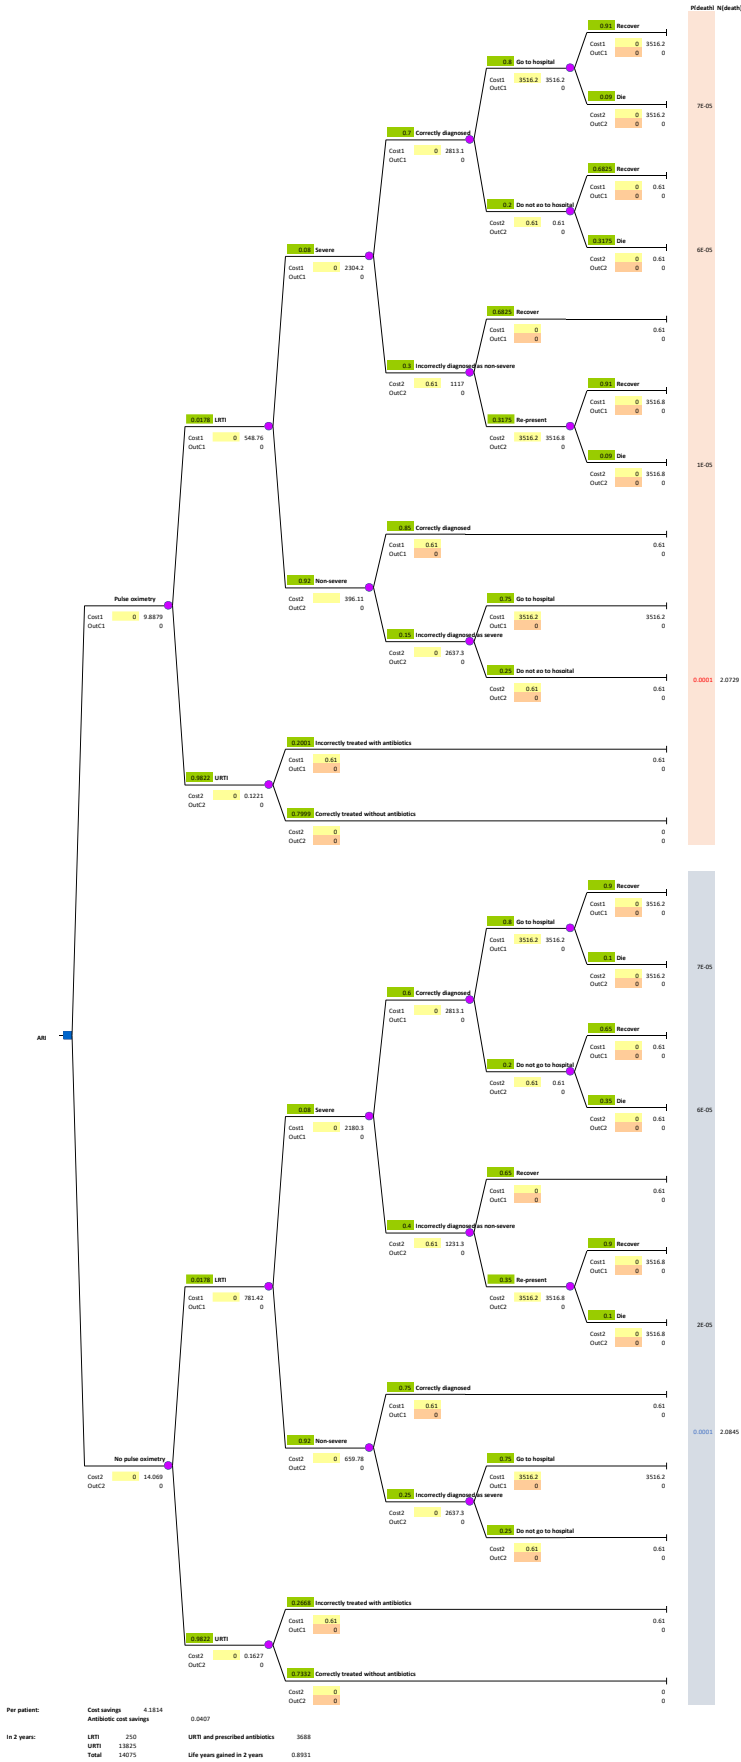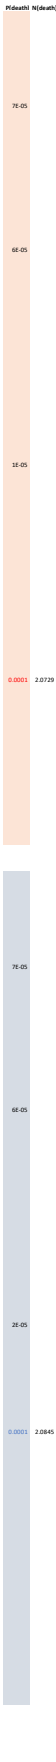

**SENSITIVITY ANALYSIS 4**

Parameters as per SA3, but with no antibiotic cost savings

|               | Median age | No.          | % H0 deaths in 2 years | H1 deaths in 2 years | Difference in deaths in 2 years | YLL for death at median age | Life years gained in 2 years | Life years gained in 1 year | Cost difference excl. direct costs in 2 years | Cost difference excl. direct costs in 1 year | Cost difference incl. direct costs in 1 year | Cost per life year gained incl. direct costs | Cost per life year gained excl. direct costs | Antibiotic cost savings in 1 year |
|---------------|------------|--------------|------------------------|----------------------|---------------------------------|-----------------------------|------------------------------|-----------------------------|-----------------------------------------------|----------------------------------------------|----------------------------------------------|----------------------------------------------|----------------------------------------------|-----------------------------------|
| Children <5   | 2          | 14075        | 28.174                 | 2.084451             | 2.072876                        | 0.011575                    | 77.155993                    | 0.893059                    | 0.446529                                      | -58290.12609                                 | -29145.06305                                 | -4902.295047                                 | -10978.66151                                 | 0                                 |
| Children 5-14 | 8          | 11741        | 23.502                 | 0.820555             | 0.815999                        | 0.004556                    | 71.593286                    | 0.326211                    | 0.163106                                      | -22788.99984                                 | -11394.49992                                 |                                              | -69859.68427                                 | 0                                 |
| Adults        | 45         | 24142        | 48.325                 | 1.747495             | 1.737791                        | 0.009704                    | 39.037158                    | 0.378802                    | 0.189401                                      | -48859.49467                                 | -24429.74734                                 |                                              | -128984.1369                                 | 0                                 |
| <b>Total</b>  | <b>13</b>  | <b>49958</b> | <b>100</b>             | <b>4.652501</b>      | <b>4.626666</b>                 | <b>0.025835</b>             | <b>57.427888</b>             | <b>1.598072</b>             | <b>0.799036</b>                               | <b>-129938.6206</b>                          | <b>-64969.3103</b>                           | <b>-40726.5423</b>                           |                                              | <b>0</b>                          |

H0 - standard of care

H1 - standard of care + pulse oximetry

Assume lifespan of one oximeter is 2 years

|                                                  |                  |
|--------------------------------------------------|------------------|
| Purchase price of one oximeter set plus neonatal | 275              |
| Maintenance cost of one oximeter set per year    | 55               |
| District-wide training cost over 2 years         | 2649.504         |
| Extra staff cost per PCU over two years          | 662.376          |
| <b>Total oximeter costs over 2 years</b>         | <b>48485.536</b> |
| <b>Total oximeter costs over 1 year</b>          | <b>24242.768</b> |

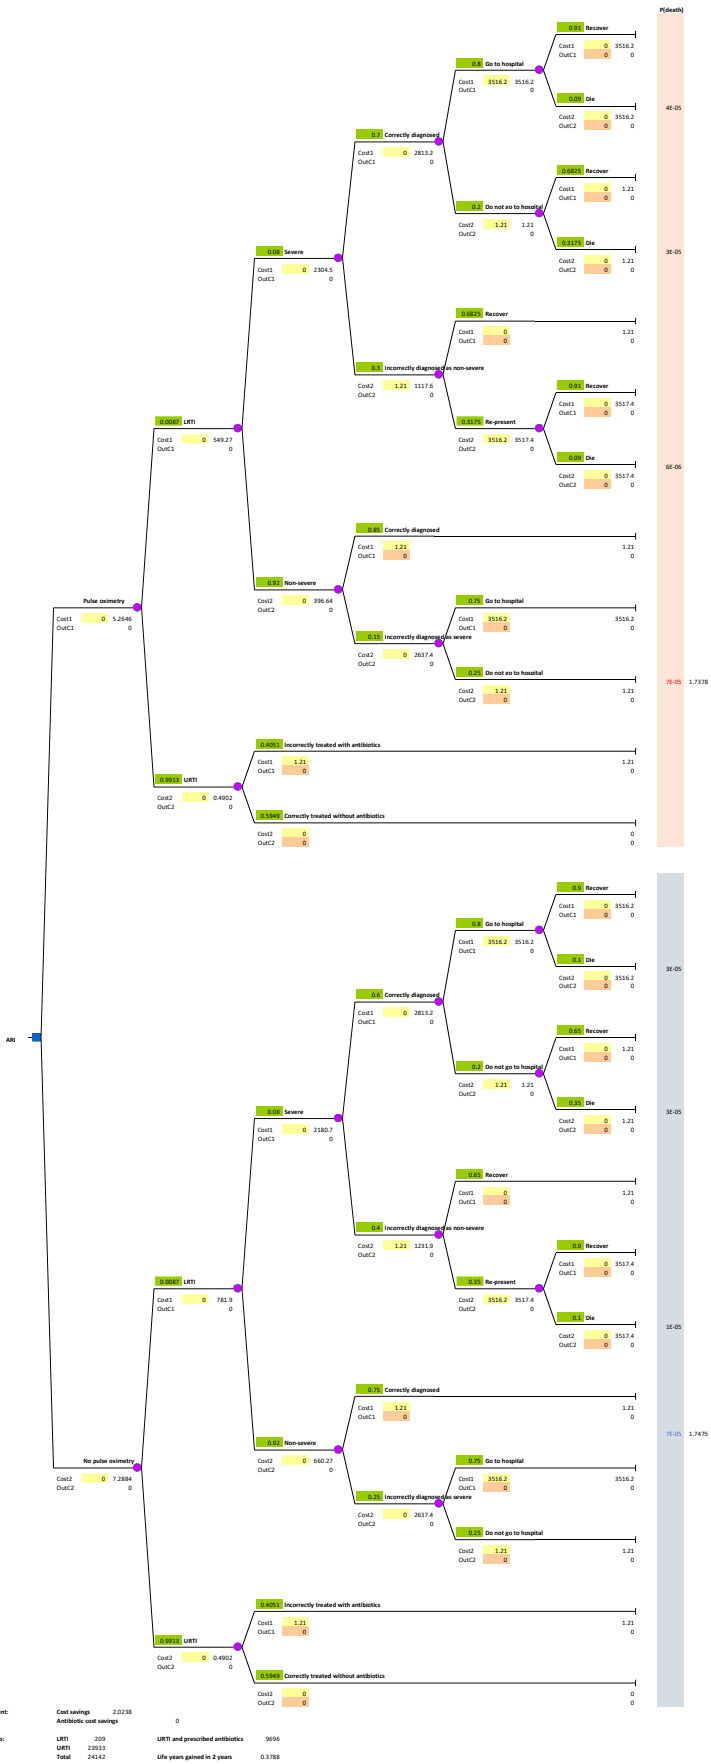

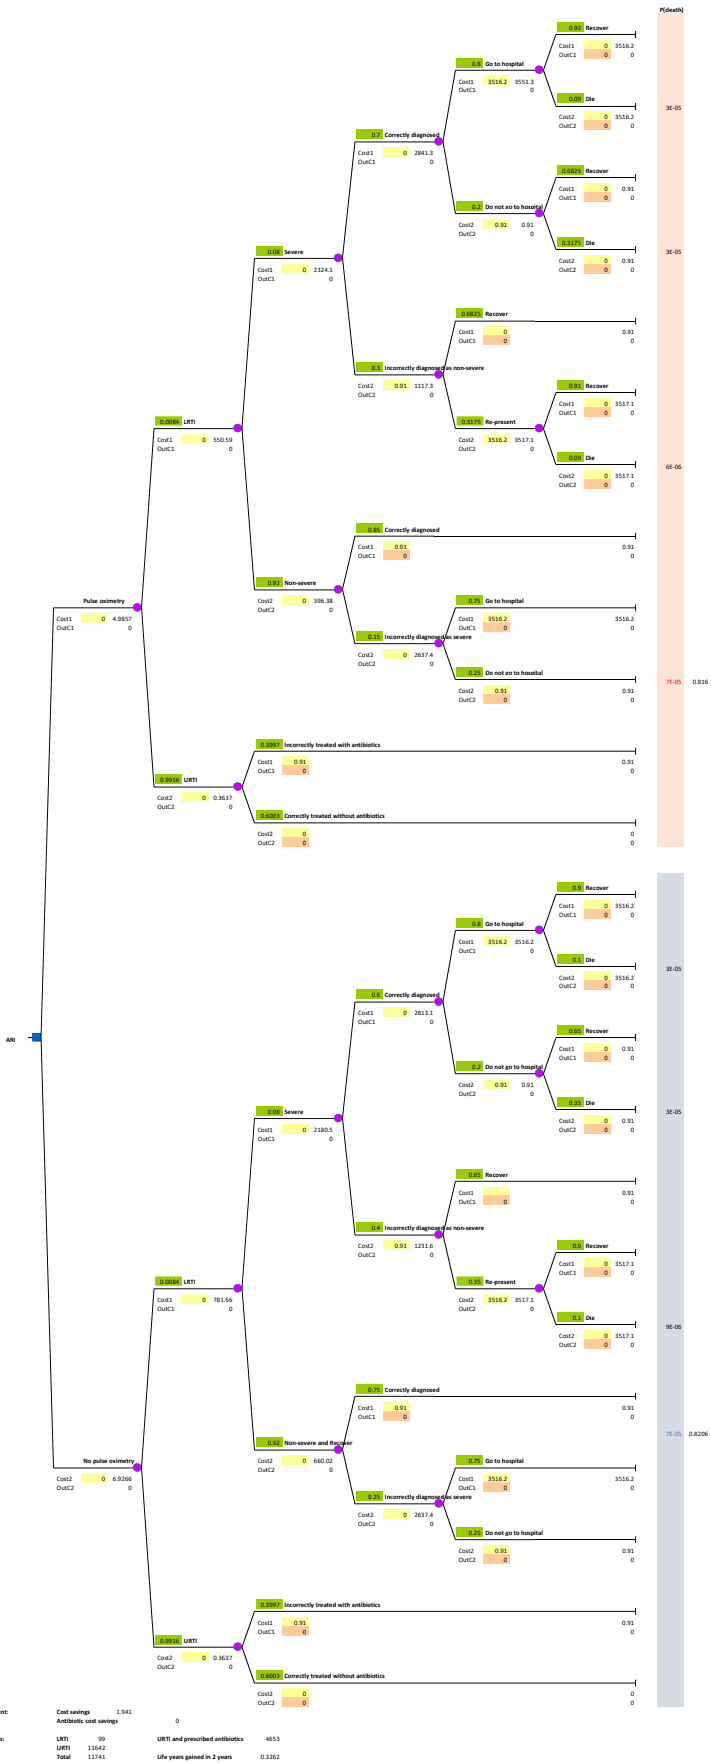

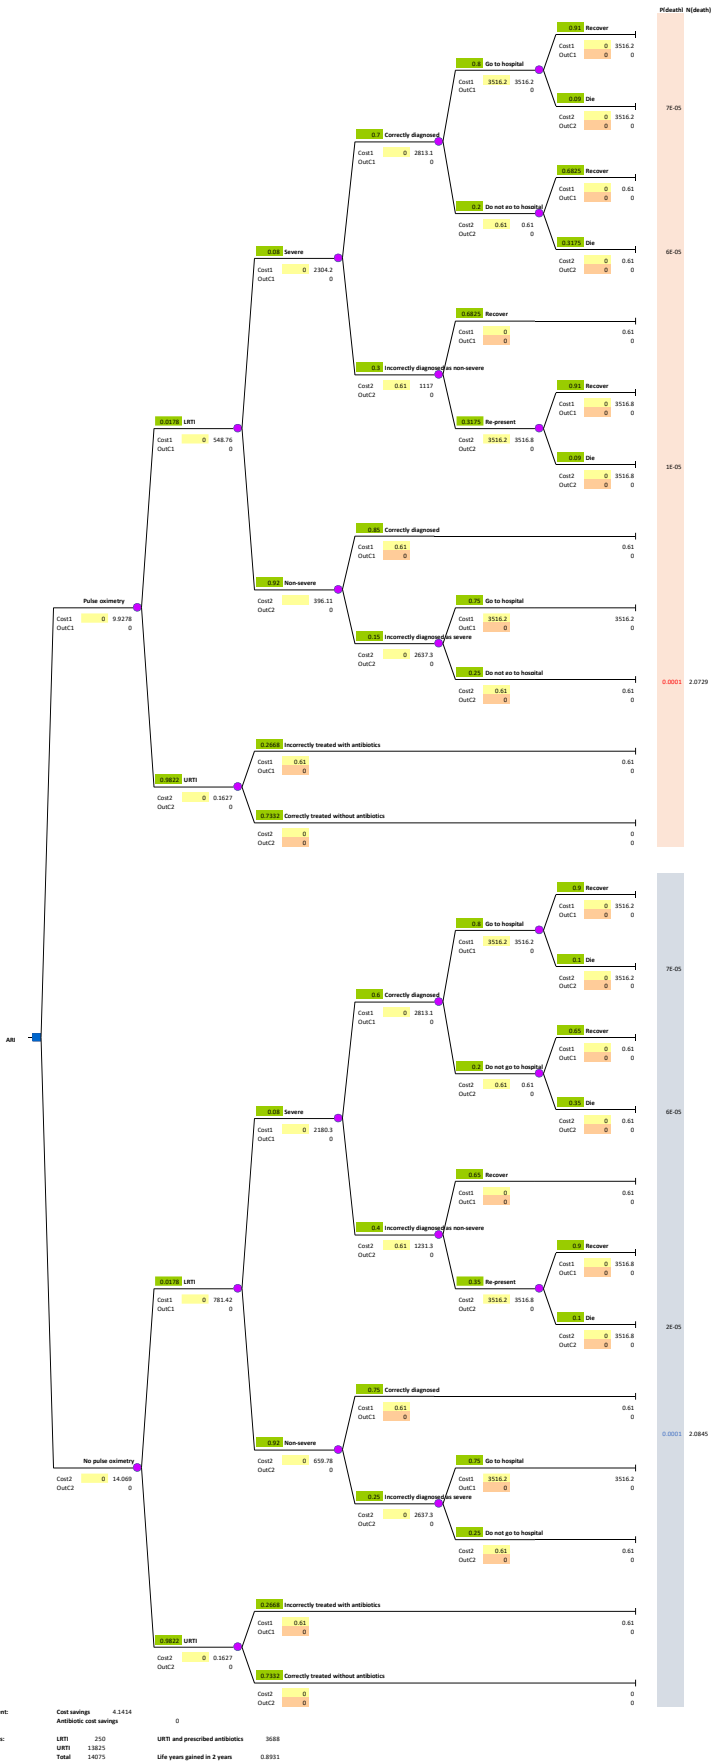

|              |                                 |        |  |
|--------------|---------------------------------|--------|--|
| Per patient: | Cost savings                    | 4,3434 |  |
|              | Antibiotic cost savings         | 0      |  |
| In 2 years:  | LRTI                            | 250    |  |
|              | URT                             | 13825  |  |
|              | Total                           | 14075  |  |
|              | LRTI and prescribed antibiotics | 3688   |  |
|              | Life years gained in 2 years    | 0.0301 |  |
