# Supplementary material for: Modelling the cost‐effectiveness of pulse oximetry in primary care management of acute respiratory infection in rural northern Thailand
Source: PubMed Central journal article supplement (PMC9805201; doi:10.1111/tmi.13812), 2022-08-30
Supplement: TMI-27-881-s004.pdf [file TMI-27-881-s004.pdf]

## 2015

| Indicator                         | Age Group   | Life expectancy | Number in cohort | Person-years | Mean life expectancy | Children <5   | 77.15599 |
|-----------------------------------|-------------|-----------------|------------------|--------------|----------------------|---------------|----------|
| ex - expectation of life at age x | <1 year     | 77.41124487     | 1095             | 84765.31     |                      | Children 5-14 | 71.59329 |
| ex - expectation of life at age x | 1-4 years   | 77.13445978     | 12980            | 1001205      |                      | Adults        | 39.03716 |
| ex - expectation of life at age x | 5-9 years   | 73.24818844     | 7749             | 567600.2     |                      | All patients  | 57.42789 |
| ex - expectation of life at age x | 10-14 years | 68.38090194     | 3992             | 272976.6     |                      |               |          |
| ex - expectation of life at age x | 15-19 years | 63.54704754     | 2065             | 131224.7     |                      |               |          |
| ex - expectation of life at age x | 20-24 years | 58.82514329     | 2025             | 119120.9     |                      |               |          |
| ex - expectation of life at age x | 25-29 years | 54.15033906     | 1950             | 105593.2     |                      |               |          |
| ex - expectation of life at age x | 30-34 years | 49.53621228     | 2036             | 100855.7     |                      |               |          |
| ex - expectation of life at age x | 35-39 years | 45.02003823     | 1918             | 86348.43     |                      |               |          |
| ex - expectation of life at age x | 40-44 years | 40.57887747     | 1933             | 78438.97     |                      |               |          |
| ex - expectation of life at age x | 45-49 years | 36.19703678     | 2142             | 77534.05     |                      |               |          |
| ex - expectation of life at age x | 50-54 years | 31.88005954     | 2432             | 77532.3      |                      |               |          |
| ex - expectation of life at age x | 55-59 years | 27.66014254     | 2507             | 69343.98     |                      |               |          |
| ex - expectation of life at age x | 60-64 years | 23.52936483     | 1986             | 46729.32     |                      |               |          |
| ex - expectation of life at age x | 65-69 years | 19.61301974     | 1326             | 26006.86     |                      |               |          |
| ex - expectation of life at age x | 70-74 years | 15.93331117     | 782              | 12459.85     |                      |               |          |
| ex - expectation of life at age x | 75-79 years | 12.5673949      | 547              | 6874.365     |                      |               |          |
| ex - expectation of life at age x | 80-84 years | 9.543088371     | 369              | 3521.4       |                      |               |          |
| ex - expectation of life at age x | 85+ years   | 6.86356343      | 124              | 851.0819     |                      |               |          |
